# Supplementary material for: Investigation on Dye Regeneration Kinetics at P‐Type Sensitized Nanoparticle Nickel Oxide Film by Scanning Electrochemical Microscopy
Source: Hindawi journal article supplement (doi:10.1155/2022/9649711), 2022-01-01
Supplement: f1 [file 9649711.f1.zip]

Archive with 3 entries (3 files):
- Fig-SI-I.pdf
- Fig-SI-II.pdf
- Supplementary  Information (2).docx
