# Supplementary material for: Investigation on Dye Regeneration Kinetics at P‐Type Sensitized Nanoparticle Nickel Oxide Film by Scanning Electrochemical Microscopy
Source: Hindawi journal article supplement (doi:10.1155/2022/9649711), 2022-01-01
Supplement: f1 [file 9649711.f1.zip › Fig-SI-II.pdf]

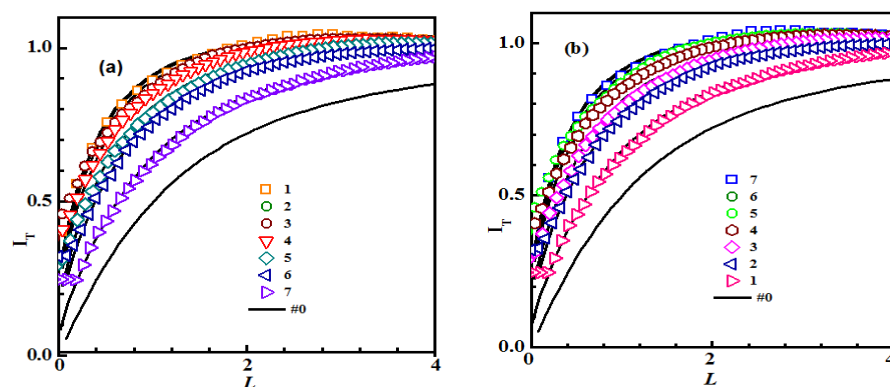

**Fig. SI-II.** Normalized SECM feedback approach curves under illumination with blue LED in different electrolytes (a) T-, and (b)  $\text{Co}^{2+}$ . Photon flux density of LED in  $10^{-9} \text{ mol cm}^{-2} \text{ s}^{-1}$  (1) 2.2, (2) 6.1, (3) 6.82 (4) 11.8, (5) 13.9, (6) 19.8 (7) 22.4;  $V_T = 0.05 \text{ Vs}^{-1}$ ,  $ET = 0.7 \text{ V}$ ,  $k$  (a) for T- electrolyte (1) 0.13, (2) 0.12, (3) 0.11, (4) 0.109 (5) 0.086 (6) 0.081 (7) 0.052 and corresponding  $k_{\text{eff}} \times 10^{-3} \text{ cms}^{-1}$  (1) 2.87 (2) 5.61 (3) 5.93, (4) 7.56 (5) 8.01 (6) 8.91 (7) 9.19 (b) for  $\text{Co}^{2+}$  electrolyte (1) 0.018 (2) 0.036, (3) 0.038 (4) 0.049 (5) 0.052 (6) 0.057 (7) 0.059 and corresponding  $k_{\text{eff}} \times 10^{-3} \text{ cms}^{-1}$  (1) 1.28, (2) 2.51, (3) 2.66 (4) 3.39 (5) 3.59 (6) 3.99 (7) 4.12
