# Supplementary material for: Investigation on Dye Regeneration Kinetics at P‐Type Sensitized Nanoparticle Nickel Oxide Film by Scanning Electrochemical Microscopy
Source: Hindawi journal article supplement (doi:10.1155/2022/9649711), 2022-01-01
Supplement: f1 [file 9649711.f1.zip › Supplementary Information (2).docx]

**Supplementary Information**

**Investigation on Dye Regeneration Kinetics at P-Type Sensitized Nanoparticle Nickel Oxide Film by Scanning Electrochemical Microscopy**

ANSHEBO Getachew Alemua1 , GEBREYOHANES Ataklti Abrahaa2

Faculty of Natural and computational science Department of Physics, Samara University, Samara, Ethiopia. a1agetachew2013alemu@yahoo.com, a2atklt.physics@gmail.com

**SI-1 . SECM approach curves on NiO samples with different dye**

Normalized heterogeneous rate constants κ have been extracted from experimental approach curves by fitting them to an analytical approximation of simulated data evaluated by Cornut and Lefrou[1,3]. The analytical approximation of Cornut and Lefrou1 was used for calculating a theoretical current *I*T for each experimental, normalized distance. The formula of Amphlett and Denuault gave for *RG* =10. Normalized approach curves *I*T vs. *L* have been calculated from each experimental approach curves *i*T(*z*) using *I*T = *i*T/*i*T,∞and L = d/rT [4-6].


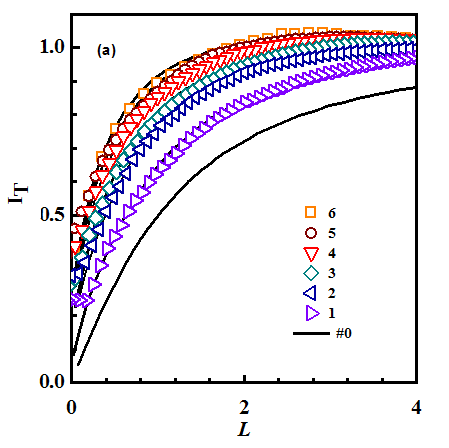

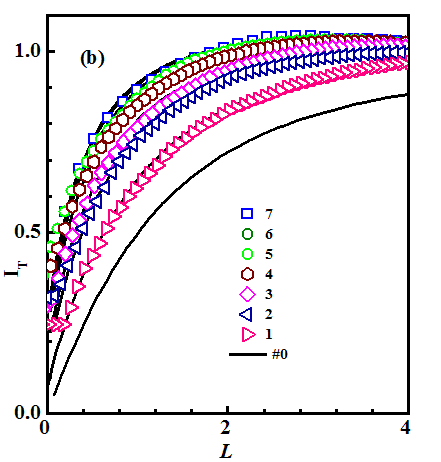


**Fig.SI-1**.(I) Normalized SECM feedback approach curves for the approach of a Pt disk UME towards NiO film in the dark (curve #0) and under illumination with red LED in different dyes in electrolyte 1mM I-+0.1MLiTFS. Photon flux density of LED in 10_9 mol cm_2 s -1 (1) 2.2, (2) 4.19, (3) 6.82 (4) 9.41, (5) 12.1, (6) 13.1 (7) 14.7; vT = 0.05 Vs_1, ET = 0.7 V, [I-] k: (a) P1 dye (1) 0.052, (2)0.081, (3) 0.086, (4) 0.109 (5) 0.11 (6) 0.12(7) 0.13 and corresponding *k*eff×10-3 cms-1 (1) 2.87 (2)5.61 (3) 5.93, (4) 7.56 (5) 8.01 (6) 8.91 (7) 9.19 (b) C343 dye (1) 0.018 (2)0.036, (3) 0.038 (4) 0.049 (5) 0.052 (6) 0.057 (7) 0.059 and corresponding *k*eff×10-3 cms-1(1) 1.28, (2)2.51, (3) 2.66 (4) 3.39 (5) 3.59 (6) 3.99 (7) 4.12

**SI-2. SECM feedback mode of P1 sensitized NiO Film with different electrolyte**


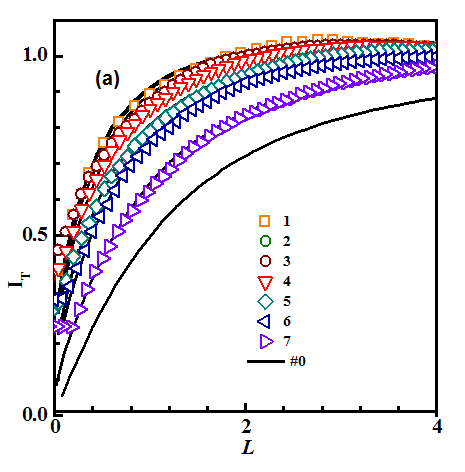

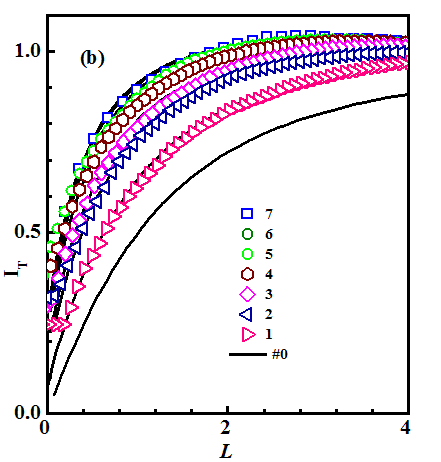


**Fig. SI-II**. Normalized SECM feedback approach curves under illumination with blue LED in different electrolytes (a) (T-), and (b) Co2+. Photon flux density of LED in 10_9 mol cm_2 s -1 (1) 2.2, (2) 6.1, (3) 6.82 (4)11.8, (5) 13.9, (6) 19.8 (7) 22.4*;*  = 0.05 Vs_1, ET = 0.7 V, *k* (a) for T- electrolyte (1) 0.13, (2)0.12, (3) 0.11, (4) 0.109 (5) 0.086 (6) 0.081(7) 0.052 and corresponding *k*eff×10-3 cms-1 (1) 2.87 (2)5.61 (3) 5.93, (4) 7.56 (5) 8.01 (6) 8.91 (7) 9.19 (b) for Co2+ electrolyte (1) 0.018 (2)0.036, (3) 0.038 (4) 0.049 (5) 0.052 (6) 0.057 (7) 0.059 and corresponding *k*eff×10-3 cms-1(1) 1.28, (2)2.51, (3) 2.66 (4) 3.39 (5) 3.59 (6) 3.99 (7) 4.12

**References**

[1] R. Cornutes and C. Lefrou, J. Electroanal. Chem.621(2008) 178-184.

[2] J. L. Amphlett and G. Denuault, J. Phys. Chem. B, 102(1998),9946-9951.

[3]U.Tefashe M.Nonomura,K.; N. Vlachopoulos; A. Hagfeldt, G. Wittstock, J. Phys.Chem.C 116(2012),4316−4323.

[4] Y. Shen, U. M. Tefashea, K. Nonomurab, T. Loewenstein, D. Schlettwein, G. Wittstock,Electrochimica Acta 55

(2009) 458–464.

[5] Y. Shen, K. Nonomura,D. Schlettwein,.C.Zhao, G.Wittstock Ju. of Electroanalytical Chemistry 650 (2010) 24–30

[6] G. Wittstock, M. Burchardt, S. E. Pust, Y. Shen, C. Zh, Angew. Chem. Int. Ed.46 (2007), 46, 1584 –1617
